# Supplementary material for: Mechanisms of Surround Suppression Effect on the Contrast Sensitivity of V1 Neurons in Cats
Source: Hindawi journal article supplement (doi:10.1155/2022/5677655), 2022-03-08
Supplement: f1 [file 5677655.f1.pdf]

**S- Figure 1**

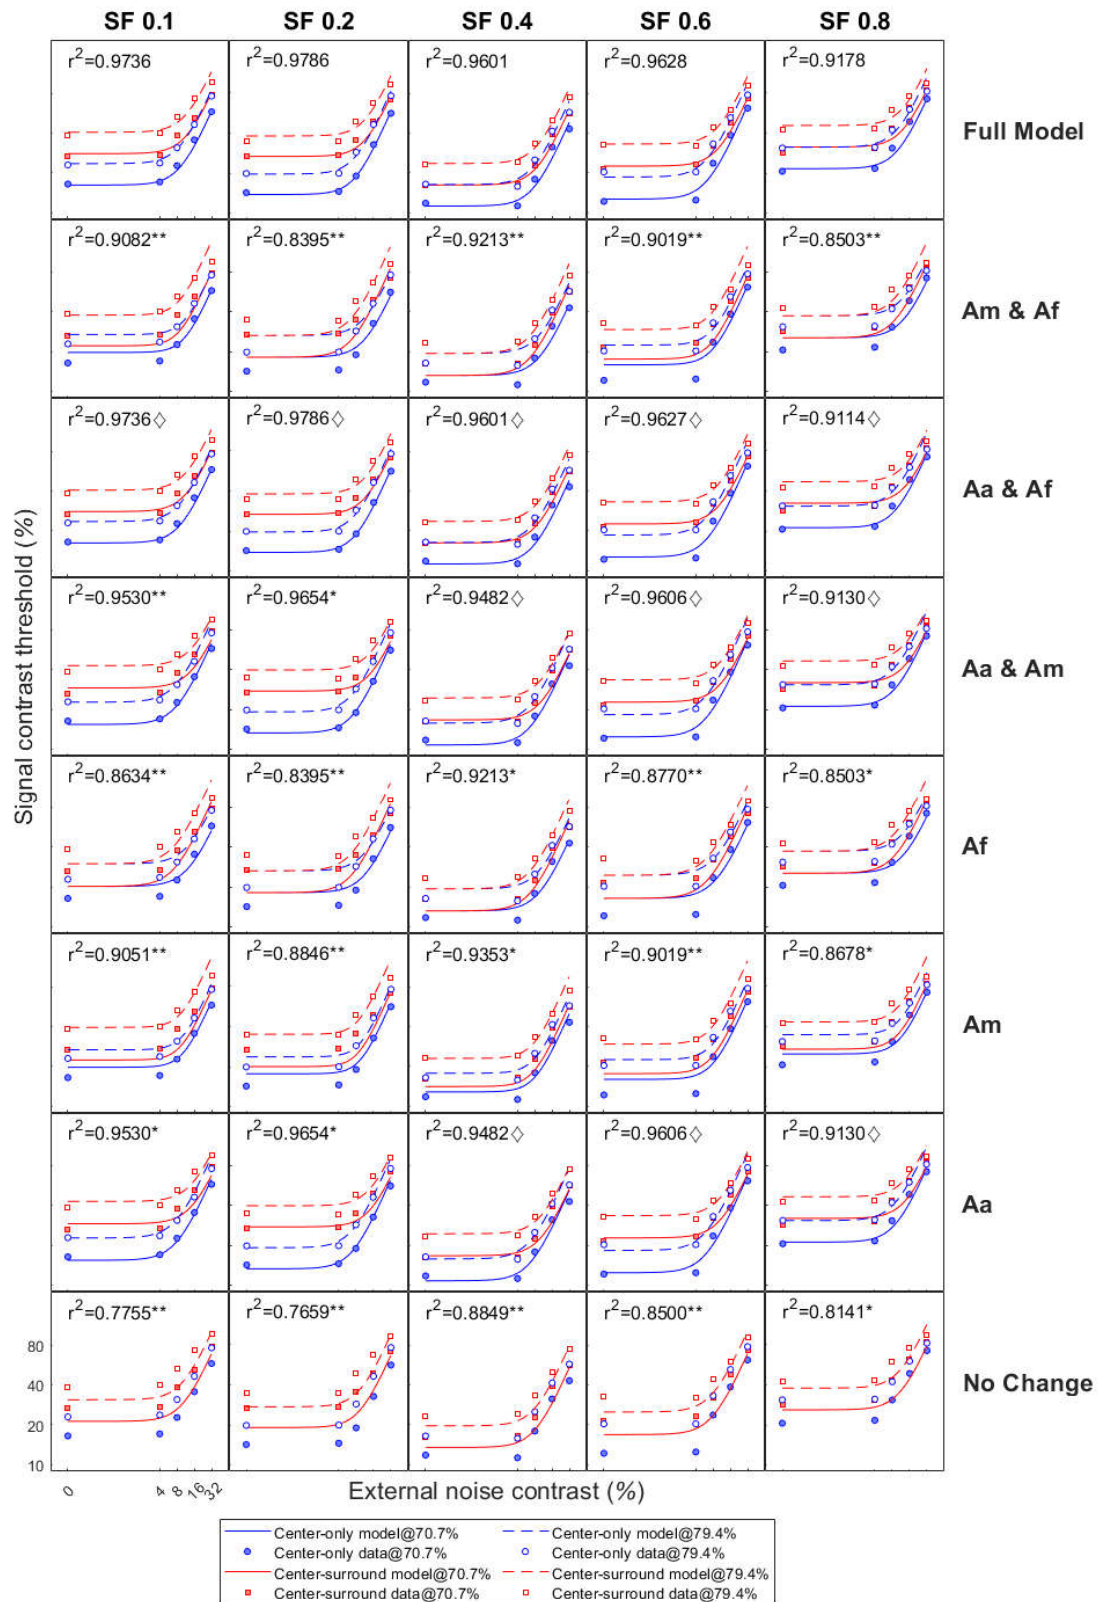

**S-Figure 1.** This figure matrix shows the results of PTM modeling arranged by SF (columns) and models (rows). In each panel, dots and squares represent mean contrast thresholds at each noise level, and smooth curves represent model fit to the data. Goodness-of-fit statistics for a given model are

provided, \* and \*\* indicate significant difference between full model and each reduced model.  $\diamond$  represents statistically equivalence between full model and each reduced model.

**S-Table 1:** P vaules of model comparisons between neuronal TvC functions at different spatial frequencies (SFs) in center-only (cRF) and center-surround (cRF+sRF) condition.  $r^2$  indicates goodness of fit.  $N_a$ ,  $N_{ext}$ ,  $N_m$ ,  $\beta$  and  $\gamma$  denotes respectively the standard deviation of internal additive noise, the standard deviation of external noise, the proportional constant of multiplicative noise, the gain of the perceptual template, and the exponent of the non-linear transducer.  $A_a$ , parameter associated with signal enhancement or equivalent to internal additive noise reduction;  $A_m$ , parameter associated with the proportional constant of multiplicative noise;  $A_f$ , parameter associated with external noise exclusion.

**Full Model**

| SF       | SF 0.1        |         | SF 0.2        |         | SF 0.1-0.2    |         | SF 0.4        |         | SF 0.6        |         | SF 0.8        |         | SF 0.4-0.8    |         |
|----------|---------------|---------|---------------|---------|---------------|---------|---------------|---------|---------------|---------|---------------|---------|---------------|---------|
|          | cRF           | cRF+sRF | cRF           | cRF+sRF | cRF           | cRF+sRF | cRF           | cRF+sRF | cRF           | cRF+sRF | cRF           | cRF+sRF | cRF           | cRF+sRF |
| $r^2$    | 0.9736        |         | 0.9786        |         | 0.9736        |         | 0.9601        |         | 0.9628        |         | 0.9178        |         | 0.9591        |         |
| $N_a$    | 0.0659±0.0678 |         | 0.0518±0.0400 |         | 0.0694±0.0772 |         | 0.0524±0.0468 |         | 0.0550±0.0430 |         | 0.0874±0.0482 |         | 0.0595±0.0441 |         |
| $N_m$    | 0.1393±0.1813 |         | 0.0801±0.1463 |         | 0.1399±0.1846 |         | 0.1055±0.1665 |         | 0.0696±0.1381 |         | 0.0257±0.0882 |         | 0.0635±0.1353 |         |
| $\beta$  | 0.6812±0.2266 |         | 0.6288±0.1163 |         | 0.6995±0.2974 |         | 0.7644±0.1721 |         | 0.5679±0.1123 |         | 0.5355±0.1522 |         | 0.6354±0.1134 |         |
| $\gamma$ | 1.6964±1.1733 |         | 1.4478±0.7947 |         | 1.7016±1.1791 |         | 1.5031±0.8423 |         | 1.2577±0.5990 |         | 1.1410±0.3356 |         | 1.2962±0.6301 |         |
| $A_a$    | 2.2828±1.7445 |         | 2.4038±1.1691 |         | 2.3461±1.8211 |         | 1.6630±0.8384 |         | 2.1336±1.4204 |         | 1.5370±0.3517 |         | 1.8184±0.8869 |         |
| $A_m$    | 2.1617±1.9584 |         | 2.0547±1.8478 |         | 2.1352±1.9787 |         | 1.6708±1.4963 |         | 1.9432±1.7891 |         | 1.7203±1.4675 |         | 1.8592±1.6894 |         |
| $A_f$    | 1.4306±0.4116 |         | 1.2907±0.2303 |         | 1.4578±0.5117 |         | 1.2254±0.2165 |         | 1.1409±0.1450 |         | 1.2109±0.2326 |         | 1.2062±0.1749 |         |



|          |               |                   |               |                   |               |                   |               |                   |               |                   |               |                   |               |                   |
|----------|---------------|-------------------|---------------|-------------------|---------------|-------------------|---------------|-------------------|---------------|-------------------|---------------|-------------------|---------------|-------------------|
| $r^2$    | 0.9736        |                   | 0.9786        |                   | 0.9736        |                   | 0.9601        |                   | 0.9627        |                   | 0.9114        |                   | 0.9644        |                   |
| p        | 1             |                   | 1             |                   | 1             |                   | 1             |                   | 0.934         |                   | 0.3329        |                   | 1             |                   |
| Na       | 0.0704±0.0695 |                   | 0.0529±0.0385 |                   | 0.0749±0.0755 |                   | 0.0601±0.0526 |                   | 0.0525±0.0405 |                   | 0.0871±0.0419 |                   | 0.0623±0.0445 |                   |
| Nm       | 0.1324±0.1870 |                   | 0.0974±0.1615 |                   | 0.1308±0.1839 |                   | 0.1001±0.1693 |                   | 0.0875±0.1581 |                   | 0.0342±0.0947 |                   | 0.0691±0.1426 |                   |
| $\beta$  | 0.7037±0.2371 |                   | 0.6409±0.1035 |                   | 0.7207±0.3020 |                   | 0.7914±0.2109 |                   | 0.5736±0.1139 |                   | 0.5310±0.1028 |                   | 0.6464±0.1219 |                   |
| $\gamma$ | 1.4538±0.7982 |                   | 1.3282±0.4782 |                   | 1.4623±0.8641 |                   | 1.4034±0.7500 |                   | 1.2310±0.4723 |                   | 1.1268±0.2646 |                   | 1.2256±0.4890 |                   |
| Aa       | 1             | 2.5748±<br>1.9971 | 1             | 2.6074±<br>1.4531 | 1             | 2.5212±<br>1.9760 | 1             | 1.6888±<br>0.8660 | 1             | 2.2839±<br>1.6314 | 1             | 1.5416±<br>0.3817 | 1             | 1.9119±<br>1.1795 |
| Am       | 1             |                   | 1             |                   | 1             |                   | 1             |                   | 1             |                   | 1             |                   | 1             |                   |
| Af       | 1             | 1.4792±<br>0.4434 | 1             | 1.3270±<br>0.2176 | 1             | 1.4944±<br>0.5087 | 1             | 1.2571±<br>0.2273 | 1             | 1.1454±<br>0.1362 | 1             | 1.2056±<br>0.1866 | 1             | 1.2251±<br>0.1689 |

**Aa & Am**

| SF         | SF 0.1        |         | SF 0.2        |         | SF 0.1-0.2    |         | SF 0.4        |         | SF 0.6        |         | SF 0.8        |         | SF 0.4-0.8    |         |
|------------|---------------|---------|---------------|---------|---------------|---------|---------------|---------|---------------|---------|---------------|---------|---------------|---------|
| Parameters | cRF           | cRF+sRF | cRF           | cRF+sRF | cRF           | cRF+sRF | cRF           | cRF+sRF | cRF           | cRF+sRF | cRF           | cRF+sRF | cRF           | cRF+sRF |
| $r^2$      | 0.953         |         | 0.9654        |         | 0.953         |         | 0.9482        |         | 0.9606        |         | 0.913         |         | 0.9592        |         |
| p          | 0.0071        |         | 0.014         |         | 0.0071        |         | 0.0712        |         | 0.401         |         | 0.4022        |         | 1             |         |
| Na         | 0.0624±0.0675 |         | 0.0496±0.0390 |         | 0.0609±0.0676 |         | 0.0496±0.0439 |         | 0.0492±0.0381 |         | 0.0789±0.0387 |         | 0.0520±0.0391 |         |

|          |               |                   |               |                   |               |                   |               |                   |               |                   |               |                   |               |                   |
|----------|---------------|-------------------|---------------|-------------------|---------------|-------------------|---------------|-------------------|---------------|-------------------|---------------|-------------------|---------------|-------------------|
| Nm       | 0.1301±0.1736 |                   | 0.0909±0.1486 |                   | 0.1288±0.1733 |                   | 0.0844±0.1373 |                   | 0.0749±0.1399 |                   | 0.0296±0.0888 |                   | 0.0615±0.1266 |                   |
| $\beta$  | 0.6285±0.2490 |                   | 0.5898±0.1005 |                   | 0.6119±0.2523 |                   | 0.7035±0.1586 |                   | 0.5403±0.1102 |                   | 0.4952±0.0799 |                   | 0.5884±0.1035 |                   |
| $\gamma$ | 1.6139±1.0406 |                   | 1.4598±0.8321 |                   | 1.6577±1.0698 |                   | 1.4932±0.8645 |                   | 1.2922±0.6124 |                   | 1.1457±0.3220 |                   | 1.3243±0.6567 |                   |
| Aa       | 1             | 2.5769±<br>2.0106 | 1             | 2.6052±<br>1.4425 | 1             | 2.6363±<br>2.0247 | 1             | 1.6347±<br>0.8025 | 1             | 2.2851±<br>1.5047 | 1             | 1.5935±<br>0.3871 | 1             | 2.0502±<br>1.2281 |
| Am       | 1             | 2.5802±<br>2.9271 | 1             | 2.7441±<br>3.0424 | 1             | 2.5341±<br>2.8169 | 1             | 3.6856±<br>3.7130 | 1             | 2.0745±<br>2.4176 | 1             | 2.5239±<br>2.5406 | 1             | 2.3627±<br>2.7912 |
| Af       | 1             |                   | 1             |                   | 1             |                   | 1             |                   | 1             |                   | 1             |                   | 1             |                   |

**Af**

| SF         | SF 0.1        |         | SF 0.2        |         | SF 0.1-0.2    |         | SF 0.4        |         | SF 0.6        |         | SF 0.8        |         | SF 0.4-0.8    |         |
|------------|---------------|---------|---------------|---------|---------------|---------|---------------|---------|---------------|---------|---------------|---------|---------------|---------|
| Parameters | cRF           | cRF+sRF | cRF           | cRF+sRF | cRF           | cRF+sRF | cRF           | cRF+sRF | cRF           | cRF+sRF | cRF           | cRF+sRF | cRF           | cRF+sRF |
| $r^2$      | 0.8634        |         | 0.8395        |         | 0.8634        |         | 0.9213        |         | 0.877         |         | 0.8503        |         | 0.8931        |         |
| p          | 0             |         | 0             |         | 0             |         | 0.0122        |         | 0.0004        |         | 0.0203        |         | 0.0019        |         |
| Na         | 0.1101±0.1008 |         | 0.1028±0.0615 |         | 0.1193±0.1011 |         | 0.0819±0.0628 |         | 0.0820±0.0492 |         | 0.1160±0.0520 |         | 0.0896±0.0548 |         |
| Nm         | 0.0905±0.1706 |         | 0.0414±0.1171 |         | 0.0838±0.1636 |         | 0.0700±0.1517 |         | 0.0534±0.1341 |         | 0.0258±0.0985 |         | 0.0445±0.1216 |         |
| $\beta$    | 0.7844±0.3927 |         | 0.7344±0.1663 |         | 0.7997±0.3708 |         | 0.8427±0.2201 |         | 0.6206±0.1165 |         | 0.5752±0.1127 |         | 0.6991±0.1319 |         |
| $\gamma$   | 1.5370±1.0992 |         | 1.1780±0.4493 |         | 1.3886±0.9471 |         | 1.3281±0.7026 |         | 1.1569±0.4789 |         | 1.1332±0.4300 |         | 1.1794±0.5001 |         |







|          |               |               |               |               |               |               |               |
|----------|---------------|---------------|---------------|---------------|---------------|---------------|---------------|
| $r^2$    | 0.7755        | 0.7659        | 0.7755        | 0.8849        | 0.85          | 0.8141        | 0.8555        |
| p        | 0             | 0             | 0             | 0.0026        | 0.0003        | 0.0119        | 0.0007        |
| Na       | 0.0745±0.0672 | 0.0664±0.0457 | 0.0769±0.0668 | 0.0668±0.0539 | 0.0669±0.0445 | 0.0942±0.0417 | 0.0719±0.0459 |
| Nm       | 0.1084±0.1839 | 0.0696±0.1539 | 0.1187±0.1921 | 0.0780±0.1588 | 0.0628±0.1455 | 0.0235±0.0941 | 0.0570±0.1394 |
| $\beta$  | 0.5769±0.1898 | 0.5528±0.0900 | 0.5841±0.1774 | 0.7036±0.1751 | 0.5314±0.1106 | 0.4815±0.0826 | 0.5823±0.0966 |
| $\gamma$ | 1.5382±0.9457 | 1.3160±0.5392 | 1.5183±0.9813 | 1.3690±0.7465 | 1.2320±0.5740 | 1.1369±0.3298 | 1.2094±0.5108 |
| Aa       | 1             | 1             | 1             | 1             | 1             | 1             | 1             |
| Am       | 1             | 1             | 1             | 1             | 1             | 1             | 1             |
| Af       | 1             | 1             | 1             | 1             | 1             | 1             | 1             |
